# Supplementary material
Source: bioRxiv or medRxiv preprint supplement (https://www.biorxiv.org/highwire/filestream/134117/field_highwire_adjunct_files/8/444521-2.pdf)

16S Wetted Samples

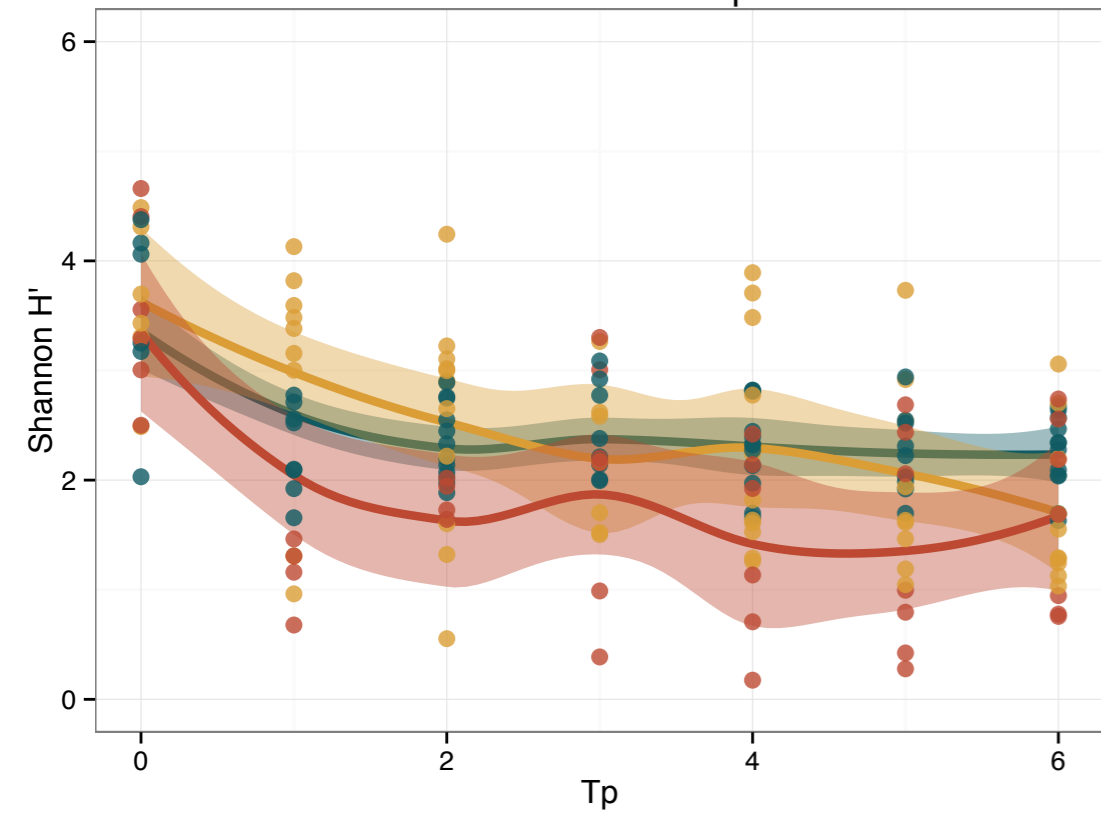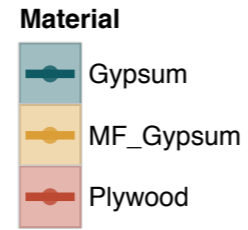

16S Non-Wetted Samples

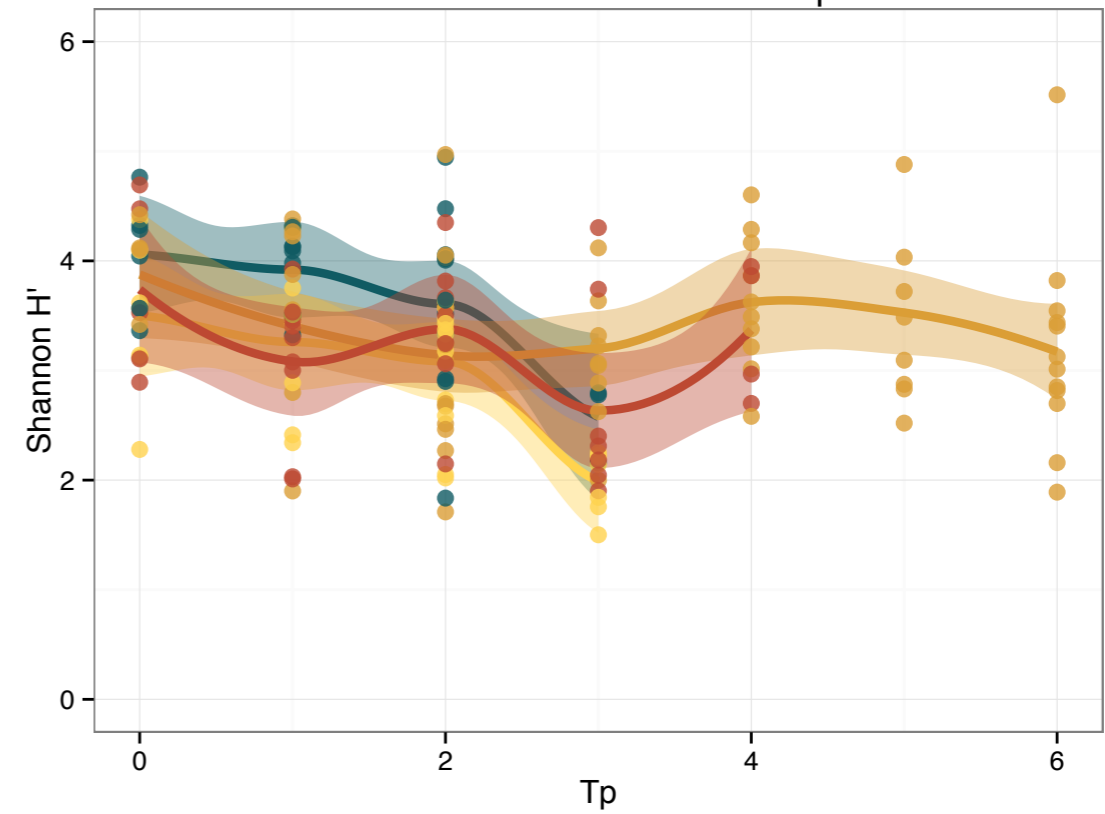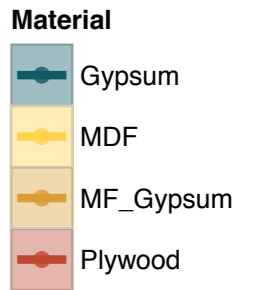

ITS Wetted Samples

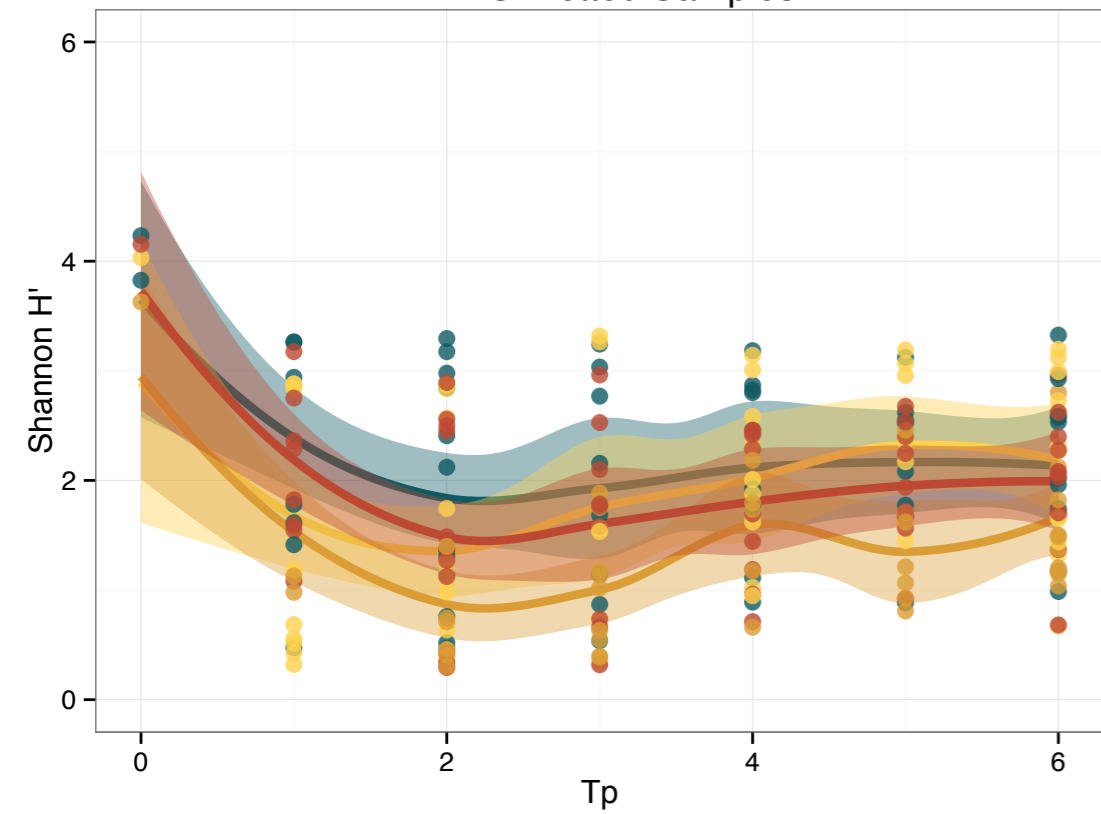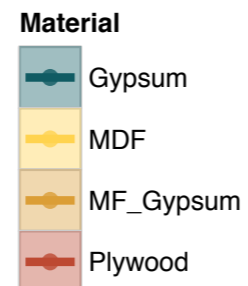

ITS Non-Wetted Samples

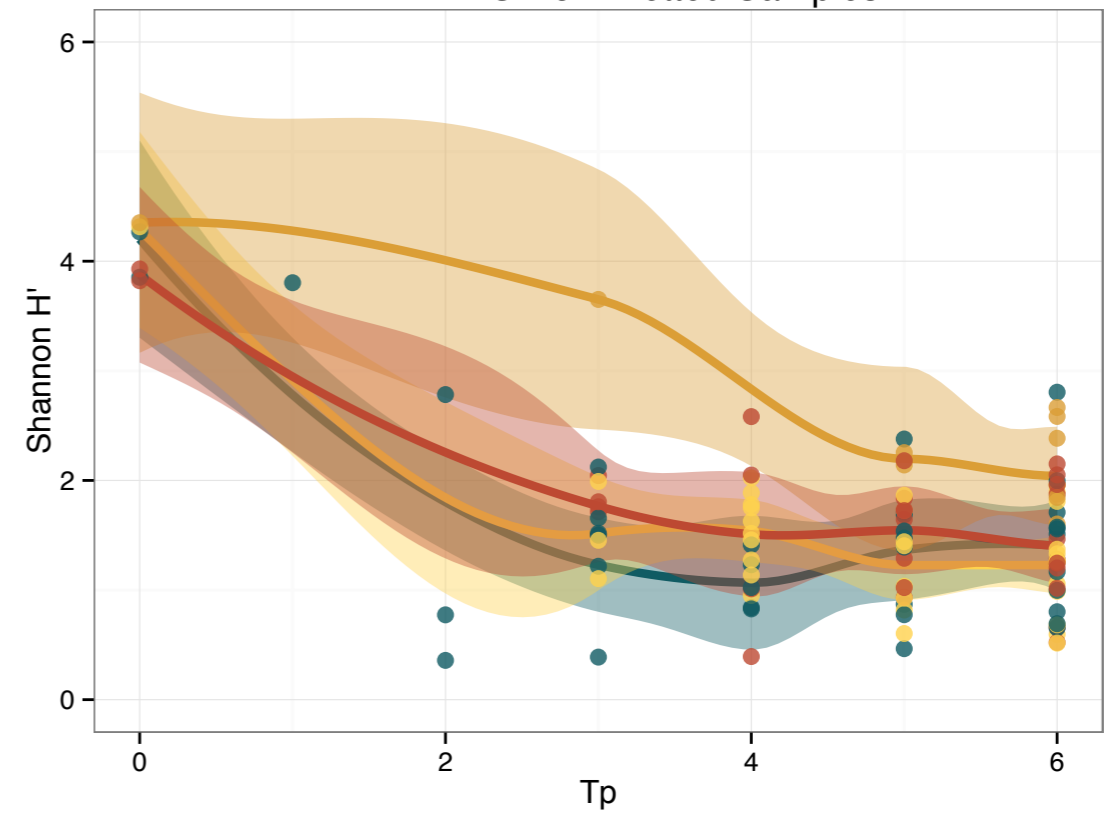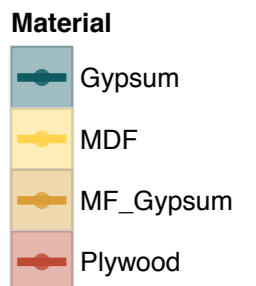

Supplement: Supplementary file [file 444521-2.pdf]
